# Supplementary material for: Self-assembly of glycoprotein nanostructured filaments for modulating extracellular networks at long range
Source: Royal Society of Chemistry journal article supplement (doi:10.1039/d3nr02644b), 2023-01-01
Supplement: d3nr02644b1.pdf [file d3nr02644b1.pdf]

## Supplementary Information

### Self-Assembly of Glycoprotein Nanostructured Filaments for Modulating Extracellular Network at Long Range

Roberto Matassa,<sup>a\*</sup> Marta Gatti,<sup>a</sup> Martina Crociati,<sup>b,c</sup> Roberto Brunelli,<sup>d</sup> Ezio Battaglione,<sup>a</sup> Massimiliano Papi,<sup>e,f</sup> Marco De Spirito,<sup>e,f</sup> Stefania Annarita Nottola,<sup>a</sup> and Giuseppe Familiari<sup>a</sup>

<sup>a</sup> Department of Anatomical, Histological, Forensic and Orthopaedic Sciences, Section of Human Anatomy, Sapienza University of Rome, Via A. Borelli 50, 00161, Rome, Italy.

<sup>b</sup> Department of Veterinary Medicine, University of Perugia, Via San Costanzo, 4, Perugia, 06126, Italy.

<sup>c</sup> Centre for Perinatal and Reproductive Medicine, University of Perugia, 06129 Perugia, Italy.

<sup>d</sup> Department of Gynecological-Obstetric and Urologic Sciences, Sapienza University of Rome, Rome, Italy.

<sup>e</sup> Dipartimento di Neuroscienze, Università Cattolica del Sacro Cuore, Largo Francesco Vito 1, 00168 Rome, Italy.

<sup>f</sup> Fondazione Policlinico Universitario A. Gemelli IRCSS, 00168 Rome, Italy.

\*Correspondence: roberto.matassa@uniroma1.it

## Cross-sectioned of Zona Pellucida from Immature to Fertilized stages

### Zona Pellucida

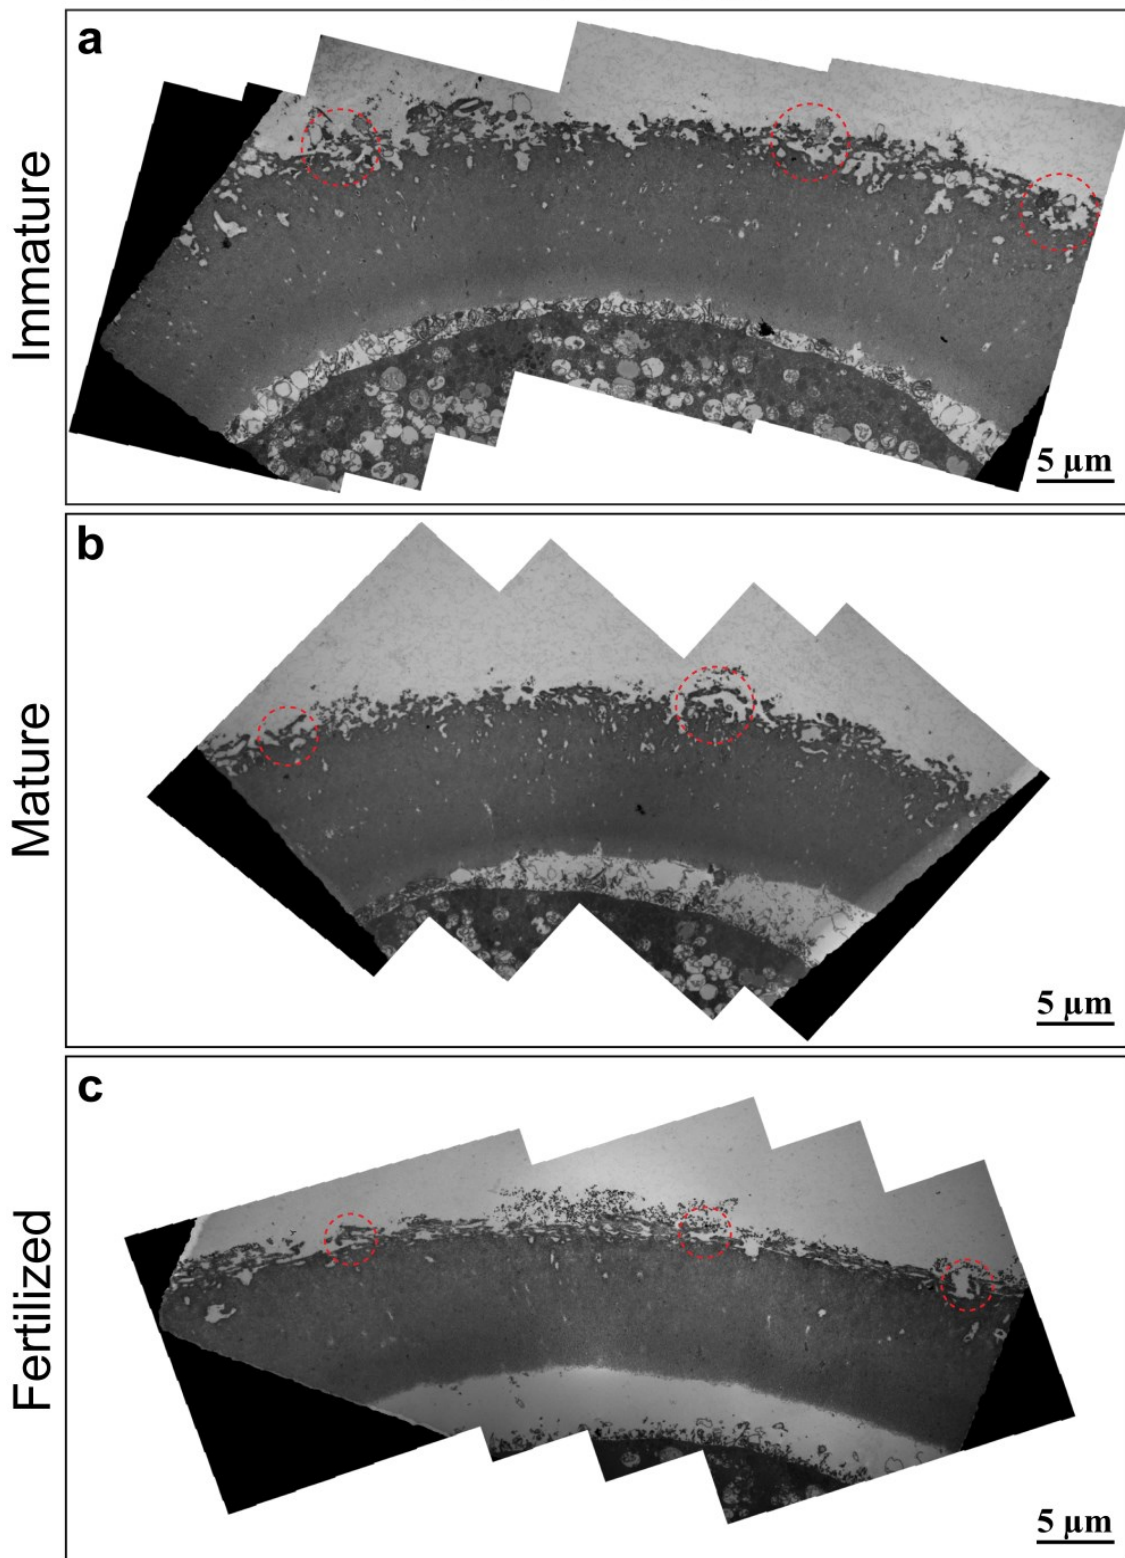

**Figure S1.** Whole mount view of the transmission electron microscopy images of cross-sectioned Zona Pellucida. **a)** Immature stage. **b)** Mature stage. **c)** Fertilized stage. TEM images were merged to better image their morpho-structure features. Moreover, the outer surfaces of a biological system evidence shading effect capable of hiding depression onto the surface generated by irregular protrusions along the projection direction. Therefore, red dot line circles evidence the real aspect of the highest complex roughness containing forward or backward bending, voids, or other irregular texture profiles that it would not be possible to observe through surface microscopy techniques (i.e.: SEM, AFM, STM, etc..).

**Table S1.** Selected roughness profile parameters computed over the sampling length with a cut-off wavelength of  $1/5\lambda$  and ISO 4287 standard [International Organization for Standardization 1997, ISO 4287:1997, Geometrical Product Specifications (GPS) – Surface texture: Profile Method – Terms, Definitions and Surface Texture Parameters, ISO. Geneva, Switzerland.]. ISO 13565-2, 1996, Geometrical Product Specifications (GPS) – Surface texture: Profile method; Surfaces having stratified functional properties – Part 2: Height characterization using the linear material ratio curve, International Organization for Standardization, Geneva.

| ZP Stage   | Peak Count Number<br>$R_{pc}$ | Total Height<br>$R_t$ ( $\mu\text{m}$ ) | Mean Height Profile<br>$R_c$ ( $\mu\text{m}$ )    | Mean Width Profile<br>$R_{sm}$ ( $\mu\text{m}$ )  |                                                     |
|------------|-------------------------------|-----------------------------------------|---------------------------------------------------|---------------------------------------------------|-----------------------------------------------------|
| Immature   | 8082±909                      | 3.17±0.66                               | 1.47±0.15                                         | 1.15±0.20                                         |                                                     |
| Mature     | 7012±760                      | 2.43±0.59                               | 1.17±0.29                                         | 1.50±0.37                                         |                                                     |
| Fertilized | 4972±803                      | 1.94±0.31                               | 0.89±0.08                                         | 1.72±0.21                                         |                                                     |
| ZP Stage   | Skewness<br>$R_{sk}$          | Kurtosis<br>$R_{ku}$                    | Roughness Core Profile<br>$R_k$ ( $\mu\text{m}$ ) | Reduced Peak Height<br>$R_{pk}$ ( $\mu\text{m}$ ) | Reduced Valley Height<br>$R_{vk}$ ( $\mu\text{m}$ ) |
| Immature   | -0.18±0.10                    | 3.01±0.19                               | 1.24±0.30                                         | 0.39±0.14<br>Mr1= 6.27±2.58%                      | 0.72±0.19<br>Mr2= 84.40±3.32%                       |
| Mature     | -0.45±0.13                    | 3.50±0.25                               | 0.94±0.30                                         | 0.32±0.10<br>Mr1= 7.13±0.84%                      | 0.59±0.24<br>Mr2= 84.17±1.62%                       |
| Fertilized | -0.21±0.10                    | 3.26±0.21                               | 0.62±0.04                                         | 0.22±0.07<br>Mr1= 5.72±1.12%                      | 0.27±0.17<br>Mr2= 87.74±3.38%                       |

Note:  $R_t$ : average height between maximum peak to minimum valley.  $R_c$ : mean height of the neighbouring peak-valley pairs.  $R_{sm}$ : mean width of the neighbouring peak-valley pairs.  $R_{sk}$ : measure of the asymmetry of the profile about the mean line.  $R_{ku}$ : measure of the peakedness of the profile about the mean line.  $R_{pc}$ : total peak count numbers.  $R_k$ : the roughness core profile is the height difference between those two points where the horizontal intersection lines cross the Material Ratio Curve.  $R_{pk}$ : average reduced peak height of the protruding peaks above the core roughness profile.  $R_{pk}$  is calculated as the height of the right angle triangle, which has the same area as the peak area A1 and Mr1 as its base.  $R_{vk}$ : average reduced valley height of the deep valleys below the core roughness profile.  $R_{vk}$  is the height of the right angle triangle, which has the same area as the valley area A2 and 100%-Mr2 as its base.  $Mr_1$ : Material ratio where the upper horizontal intersection line which separates protruding peaks from the core roughness profile crosses the Material Ratio Curve.  $Mr_2$ : Material ratio where the lower horizontal intersection line which separates deep valleys from the core roughness profile crosses the Material Ratio Curve.

**Table S2.** Estimated center of each Gaussian function with the corresponding amplitudes of the ADF profiles

| Gaussian curves of the deconvolved ZP-ADFs |              |                         |              |                         |              |
|--------------------------------------------|--------------|-------------------------|--------------|-------------------------|--------------|
| I-ADF                                      |              | M-ADF                   |              | F-ADF                   |              |
| Center( $\mu\text{m}$ )                    | Amplitude(%) | Center( $\mu\text{m}$ ) | Amplitude(%) | Center( $\mu\text{m}$ ) | Amplitude(%) |
| -1.05±0.02                                 | 0.09±0.01    | —                       | —            | —                       | —            |
| -0.94±0.01                                 | 0.14±0.03    | —                       | —            | —                       | —            |
| -0.85±0.00                                 | 0.19±0.05    | -0.82±0.02              | 0.11±0.01    | -0.80±0.01              | 0.11±0.01    |
| -0.74±0.01                                 | 0.20±0.01    | -0.73±0.01              | 0.12±0.05    | —                       | —            |
| —                                          | —            | -0.66±0.01              | 0.15±0.03    | -0.65±0.01              | 0.26±0.01    |
| -0.58±0.01                                 | 0.30±0.02    | -0.57±0.01              | 0.28±0.01    | -0.54±0.01              | 0.25±0.05    |
| -0.48±0.01                                 | 0.36±0.07    | —                       | —            | -0.47±0.01              | 0.34±0.16    |
| -0.42±0.01                                 | 0.41±0.18    | —                       | —            | -0.39±0.01              | 0.44±0.04    |
| -0.34±0.01                                 | 0.40±0.03    | -0.34±0.01              | 0.46±0.01    | -0.30±0.01              | 0.50±0.12    |
| —                                          | —            | -0.26±0.01              | 0.54±0.05    | -0.24±0.01              | 0.66±0.12    |
| -0.21±0.01                                 | 0.61±0.04    | -0.21±0.01              | 0.59±0.02    | -0.20±0.01              | 0.67±0.17    |
| —                                          | —            | -0.16±0.01              | 0.57±0.11    | -0.16±0.01              | 0.70±0.12    |
| -0.12±0.01                                 | 0.57±0.14    | -0.11±0.01              | 0.70±0.04    | -0.11±0.01              | 0.83±0.04    |
| -0.05±0.01                                 | 0.55±0.16    | -0.02±0.01              | 0.67±0.04    | -0.05±0.01              | 0.75±0.09    |
| 0.01±0.01                                  | 0.62±0.07    | 0.03±0.01               | 0.70±0.19    | 0.01±0.01               | 0.79±0.06    |
| 0.08±0.01                                  | 0.64±0.14    | 0.08±0.01               | 0.69±0.10    | 0.07±0.01               | 1.01±0.04    |
| 0.14±0.01                                  | 0.61±0.23    | 0.13±0.01               | 0.78±0.17    | 0.14±0.01               | 0.87±0.10    |
| —                                          | —            | 0.17±0.01               | 0.67±0.11    | —                       | —            |
| 0.21±0.01                                  | 0.62±0.17    | 0.24±0.01               | 0.78±0.08    | 0.21±0.01               | 0.95±0.07    |
| 0.27±0.01                                  | 0.69±0.16    | —                       | —            | —                       | —            |
| 0.34±0.01                                  | 0.57±0.19    | 0.33±0.01               | 0.68±0.05    | 0.32±0.01               | 0.71±0.05    |
| 0.43±0.01                                  | 0.50±0.09    | 0.40±0.01               | 0.47±0.21    | 0.39±0.01               | 0.61±0.08    |
| —                                          | —            | 0.46±0.01               | 0.38±0.20    | 0.45±0.01               | 0.32±0.01    |
| 0.52±0.01                                  | 0.41±0.11    | 0.53±0.01               | 0.26±0.17    | 0.55±0.01               | 0.15±0.01    |
| 0.60±0.01                                  | 0.34±0.12    | 0.62±0.05               | 0.17±0.07    | —                       | —            |
| 0.68±0.01                                  | 0.34±0.06    | —                       | —            | 0.68±0.01               | 0.12±0.02    |
| 0.78±0.01                                  | 0.25±0.01    | 0.81±0.01               | 0.07±0.02    | —                       | —            |
| 0.95±0.01                                  | 0.14±0.01    | —                       | —            | —                       | —            |
| 1.05±0.01                                  | 0.08±0.04    | —                       | —            | —                       | —            |
| 1.15±0.01                                  | 0.10±0.01    | —                       | —            | —                       | —            |

Note:  $p < 0.01$  statistical significant difference between experimental and theoretical data fitting

## Zona Pellucida

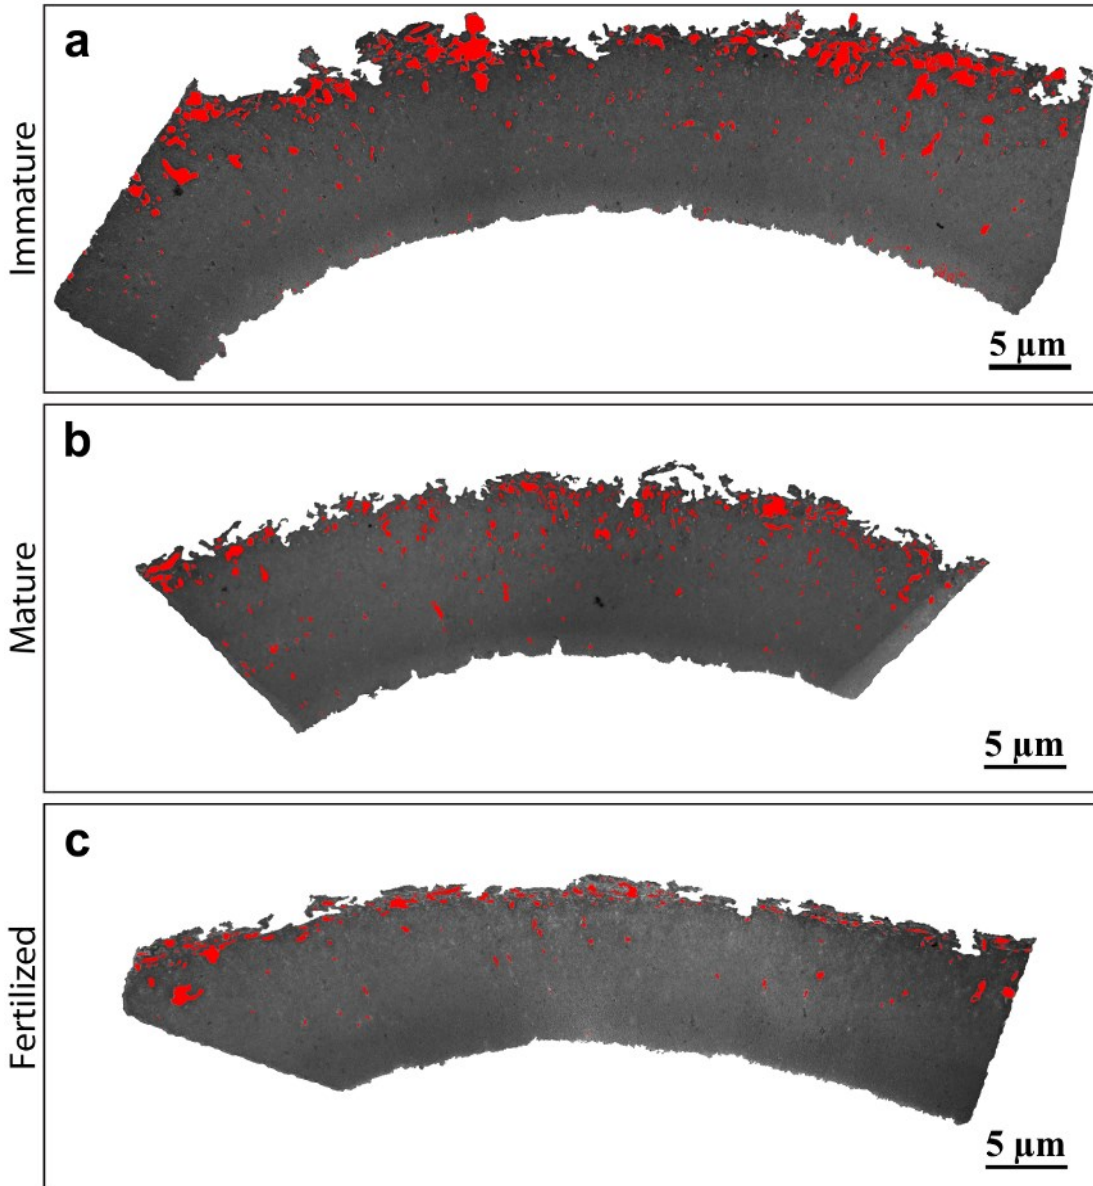

Figure S2. 2D filled pores map of the shell-arc cross-sectional of Zona Pellucida from immature to fertilized stages (Figures S1-a-c).

Table S3. Morphometric Pores Parameters

| ZP Phase   | Counts | Total Area (μm <sup>2</sup> ) | Total Porosity (%) | Total Perimeter (μm) | Average Pore Length (μm)            | Average Pore Width (μm) |
|------------|--------|-------------------------------|--------------------|----------------------|-------------------------------------|-------------------------|
| Immature   | 1      | 799.19±0.09                   | —                  | 317.18±0.04          | 0.22±0.01                           | 0.16±0.01               |
|            | 406    | 45.86±0.01                    | 5.74               | 592.46±0.09          | 0.46±0.01<br>0.75±0.02              |                         |
| Mature     | 1      | 475.22±0.12                   | —                  | 130.46±0.07          | 0.27±0.01                           | 0.14±0.01               |
|            | 285    | 20.29±0.01                    | 4.23               | 382.77±0.07          | 0.44±0.02<br>0.55±0.04<br>0.67±0.03 |                         |
| Fertilized | 1      | 509.73±0.04                   | —                  | 219.53±0.03          | 0.31±0.01                           | 0.12±0.01               |
|            | 159    | 12.08±0.01                    | 2.34               | 247.53±0.09          | 0.55±0.02<br>0.74±0.01              |                         |

Note:  $p < 0.001$  statistical significant difference between experimental and theoretical data fitting.

**Table S4.** Parameters of the deconvoluted Voight curves fitting the radial profile.

| Voight Peaks Deconvolution of the ZP-RPs   |                                        |                                           |                                        |                                           |                                        |
|--------------------------------------------|----------------------------------------|-------------------------------------------|----------------------------------------|-------------------------------------------|----------------------------------------|
| I-RP<br>(Std Err - 11.65%, FWHM – 0.40 μm) |                                        | M-RP<br>(Std Err – 7.56%, FWHM – 0.43 μm) |                                        | F-RP<br>(Std Err - 8.62%, FWHM – 0.40 μm) |                                        |
| Center<br>(μm)                             | Amplitude<br>(μm)                      | Center<br>(μm)                            | Amplitude<br>(μm)                      | Center<br>(μm)                            | Amplitude<br>(μm)                      |
| 43.34±0.12                                 | 0.14±0.10                              | 41.67±0.11                                | 0.18±0.05                              | 52.98±0.11                                | 0.19±0.09                              |
| 44.00±0.11                                 | 0.21±0.07                              | 43.68±0.08                                | 0.23±0.05                              | 53.83±0.10                                | 0.20±0.08                              |
| 44.70±0.09                                 | 0.18±0.10                              | 44.78±0.05                                | 0.19±0.05                              | 54.77±0.09                                | 0.20±0.08                              |
| 45.31±0.12                                 | 0.18±0.11                              | 45.34±0.06                                | 0.25±0.06                              | 55.35±0.10                                | 0.13±0.09                              |
| 46.15±0.08                                 | 0.17±0.08                              | 45.84±0.06                                | 0.18±0.05                              | 55.86±0.08                                | 0.24±0.10                              |
| 46.60±0.10                                 | 0.15±0.09                              | 46.46±0.10                                | 0.20±0.05                              | 56.42±0.08                                | 0.28±0.10                              |
| 47.07±0.12                                 | 0.12±0.08                              | 46.95±0.06                                | 0.20±0.05                              | 57.06±0.07                                | 0.20±0.07                              |
| 47.69±0.11                                 | 0.15±0.07                              | 47.53±0.06                                | 0.13±0.03                              | 57.56±0.08                                | 0.12±0.09                              |
| 48.31±0.10                                 | 0.17±0.08                              | 47.96±0.09                                | 0.16±0.05                              | 58.05±0.04                                | 0.30±0.07                              |
| 49.00±0.09                                 | 0.18±0.08                              | 48.35±0.05                                | 0.15±0.04                              | 58.41±0.07                                | 0.11±0.05                              |
| 49.64±0.08                                 | 0.15±0.06                              | 48.78±0.09                                | 0.19±0.04                              | 58.73±0.09                                | 0.13±0.06                              |
| 50.41±0.08                                 | 0.18±0.06                              | 49.09±0.03                                | 0.16±0.05                              | 59.04±0.08                                | 0.15±0.09                              |
| 51.14±0.06                                 | 0.19±0.06                              | 49.42±0.07                                | 0.12±0.04                              | 59.31±0.08                                | 0.15±0.07                              |
| 51.64±0.05                                 | 0.21±0.06                              | 49.84±0.04                                | 0.23±0.05                              | 59.52±0.04                                | 0.11±0.05                              |
| 52.14±0.04                                 | 0.19±0.06                              | 50.22±0.05                                | 0.13±0.04                              | 59.77±0.09                                | 0.16±0.06                              |
| 52.69±0.10                                 | 0.37±0.08                              | 50.57±0.05                                | 0.21±0.05                              | 60.12±0.07                                | 0.12±0.06                              |
| 53.25±0.03                                 | 0.36±0.07                              | 50.95±0.12                                | 0.13±0.03                              | 60.43±0.08                                | 0.09±0.06                              |
| 53.95±0.13                                 | 0.28±0.13                              | 51.30±0.07                                | 0.15±0.04                              | 60.80±0.08                                | 0.15±0.07                              |
| 54.51±0.14                                 | 0.37±0.11                              | 51.64±0.03                                | 0.20±0.05                              | 61.27±0.10                                | 0.16±0.09                              |
| 54.93±0.04                                 | 0.30±0.05                              | 51.95±0.01                                | 0.24±0.05                              | 61.66±0.11                                | 0.14±0.09                              |
| 55.27±0.06                                 | 0.21±0.06                              | 52.30±0.04                                | 0.17±0.04                              | —                                         | —                                      |
| 55.66±0.02                                 | 0.17±0.06                              | 52.84±0.03                                | 0.31±0.06                              | —                                         | —                                      |
| 56.03±0.11                                 | 0.68±0.09                              | —                                         | —                                      | —                                         | —                                      |
| 56.64±0.06                                 | 0.16±0.06                              | —                                         | —                                      | —                                         | —                                      |
| 57.15±0.05                                 | 0.19±0.07                              | —                                         | —                                      | —                                         | —                                      |
| 57.56±0.06                                 | 0.27±0.08                              | —                                         | —                                      | —                                         | —                                      |
| 58.06±0.10                                 | 0.15±0.09                              | —                                         | —                                      | —                                         | —                                      |
| 58.61±0.11                                 | 0.26±0.10                              | —                                         | —                                      | —                                         | —                                      |
| 59.30±0.13                                 | 0.20±0.11                              | —                                         | —                                      | —                                         | —                                      |
| Radial Frequency<br>(μm)                   | Pore Domain:<br>Number & Rate<br>(, %) | Radial Frequency<br>(μm)                  | Pore Domain:<br>Number & Rate<br>(, %) | Radial Frequency<br>(μm)                  | Pore Domain:<br>Number & Rate<br>(, %) |
| 0.57±0.02                                  | 20.31±2.02,<br>5.00 %                  | 0.37±0.01                                 | 20.43±1.94,<br>7.17 %                  | 0.36±0.04                                 | 16.64±1.75,<br>10.47 %                 |

Note: p < 0.01 statistical significant difference between experimental and theoretical data fitting

**Table S5.** Parameters of the Deconvoluted Voight curves fitting the angular profile.

| Voight Peaks Deconvolution of the ZP-APs               |                                        |                                                       |                                        |                                                        |                                        |
|--------------------------------------------------------|----------------------------------------|-------------------------------------------------------|----------------------------------------|--------------------------------------------------------|----------------------------------------|
| I-AP<br>(Std Err - 13.84%, FWHM - 1.41 $\mu\text{m}$ ) |                                        | M-AP<br>(Std Err – 8.42%, FWHM - 1.41 $\mu\text{m}$ ) |                                        | F-AP<br>(Std Err – 10.12%, FWHM - 1.03 $\mu\text{m}$ ) |                                        |
| Center<br>(deg.)                                       | Amplitude<br>( $\mu\text{m}$ )         | Center<br>(deg.)                                      | Amplitude<br>( $\mu\text{m}$ )         | Center<br>(deg.)                                       | Amplitude<br>( $\mu\text{m}$ )         |
| 57.25±0.17                                             | 0.18±0.16                              | 62.51±0.09                                            | 0.19±0.05                              | 64.27±0.12                                             | 0.21±0.07                              |
| 59.46±0.09                                             | 0.20±0.06                              | 65.22±0.05                                            | 0.31±0.04                              | 65.95±0.13                                             | 0.22±0.09                              |
| 61.32±0.08                                             | 0.22±0.06                              | 67.27±0.12                                            | 0.19±0.08                              | 68.06±0.10                                             | 0.08±0.09                              |
| 63.80±0.07                                             | 0.21±0.06                              | 69.08±0.05                                            | 0.13±0.04                              | 70.03±0.09                                             | 0.23±0.07                              |
| 65.91±0.08                                             | 0.27±0.06                              | 70.50±0.08                                            | 0.10±0.04                              | 72.02±0.10                                             | 0.09±0.09                              |
| 68.07±0.06                                             | 0.37±0.07                              | 71.84±0.06                                            | 0.23±0.05                              | 74.33±0.09                                             | 0.20±0.08                              |
| 69.76±0.10                                             | 0.14±0.09                              | 73.63±0.03                                            | 0.13±0.03                              | 76.03±0.08                                             | 0.14±0.06                              |
| 70.94±0.10                                             | 0.15±0.09                              | 75.58±0.03                                            | 0.36±0.03                              | 79.10±0.08                                             | 0.22±0.08                              |
| 72.72±0.12                                             | 0.30±0.09                              | 77.26±0.05                                            | 0.15±0.04                              | 83.33±0.09                                             | 0.16±0.08                              |
| 74.70±0.13                                             | 0.24±0.09                              | 79.09±0.06                                            | 0.19±0.05                              | 85.39±0.08                                             | 0.15±0.06                              |
| 76.84±0.08                                             | 0.16±0.05                              | 81.52±0.08                                            | 0.18±0.04                              | 87.52±0.06                                             | 0.21±0.05                              |
| 78.84±0.11                                             | 0.22±0.08                              | 83.54±0.04                                            | 0.17±0.04                              | 89.56±0.09                                             | 0.16±0.07                              |
| 80.64±0.09                                             | 0.15±0.06                              | 85.15±0.06                                            | 0.29±0.05                              | 90.97±0.08                                             | 0.05±0.06                              |
| 82.55±0.12                                             | 0.15±0.08                              | 87.40±0.05                                            | 0.23±0.04                              | 92.29±0.10                                             | 0.14±0.08                              |
| 84.49±0.10                                             | 0.21±0.09                              | 89.34±0.05                                            | 0.21±0.04                              | 94.19±0.08                                             | 0.13±0.06                              |
| 86.64±0.07                                             | 0.17±0.06                              | 91.08±0.04                                            | 0.15±0.03                              | 95.92±0.09                                             | 0.19±0.08                              |
| 89.61±0.12                                             | 0.22±0.10                              | 92.83±0.07                                            | 0.20±0.04                              | 98.14±0.07                                             | 0.12±0.07                              |
| 92.64±0.09                                             | 0.22±0.08                              | 94.63±0.06                                            | 0.18±0.03                              | 100.38±0.05                                            | 0.25±0.06                              |
| 94.52±0.11                                             | 0.13±0.09                              | 96.81±0.06                                            | 0.19±0.04                              | 102.09±0.08                                            | 0.13±0.06                              |
| 96.89±0.12                                             | 0.81±0.09                              | 99.04±0.07                                            | 0.16±0.03                              | 104.26±0.11                                            | 0.18±0.09                              |
| 99.00±0.06                                             | 0.28±0.08                              | 100.95±0.08                                           | 0.25±0.05                              | 106.04±0.10                                            | 0.15±0.07                              |
| 100.60±0.06                                            | 0.19±0.07                              | 103.06±0.11                                           | 0.26±0.05                              | 108.94±0.11                                            | 0.23±0.07                              |
| 102.42±0.05                                            | 0.23±0.05                              | 105.82±0.10                                           | 0.26±0.05                              | 111.64±0.08                                            | 0.20±0.06                              |
| 106.00±0.07                                            | 0.21±0.06                              | 110.25±0.08                                           | 0.27±0.05                              | 112.98±0.09                                            | 0.09±0.06                              |
| 107.95±0.09                                            | 0.22±0.08                              | 112.77±0.06                                           | 0.29±0.04                              | 114.39±0.10                                            | 0.31±0.06                              |
| 110.02±0.05                                            | 0.16±0.07                              | 115.26±0.07                                           | 0.17±0.04                              | 115.99±0.11                                            | 0.11±0.08                              |
| 111.85±0.06                                            | 0.18±0.07                              | 117.64±0.06                                           | 0.26±0.05                              | —                                                      | —                                      |
| 113.55±0.09                                            | 0.19±0.08                              | —                                                     | —                                      | —                                                      | —                                      |
| 114.75±0.13                                            | 0.25±0.11                              | —                                                     | —                                      | —                                                      | —                                      |
| 117.09±0.10                                            | 0.49±0.08                              | —                                                     | —                                      | —                                                      | —                                      |
| 120.32±0.12                                            | 0.26±0.10                              | —                                                     | —                                      | —                                                      | —                                      |
| 122.49±0.08                                            | 0.10±0.10                              | —                                                     | —                                      | —                                                      | —                                      |
| 124.45±0.11                                            | 0.17±0.10                              | —                                                     | —                                      | —                                                      | —                                      |
| Angular Frequency<br>(deg.)                            | Pore Domain:<br>Number & Rate<br>(, %) | Angular Frequency<br>(deg.)                           | Pore Domain:<br>Number & Rate<br>(, %) | Angular Frequency<br>(deg.)                            | Pore Domain:<br>Number & Rate<br>(, %) |
| 1.90±0.15                                              | 13.85±2.40,<br>3.41 %                  | 1.91±0.03                                             | 10.12±1.31,<br>3.55 %                  | 1.88±0.07                                              | 6.65±0.69,<br>4.18 %                   |

Note: p < 0.01 statistical significant difference between experimental and theoretical data fitting



# Overlapping Images of Interconnected Glycoprotein Filaments-Skeleton Segments

*ZPs Outer Surface*

Immature

Mature

Fertilized

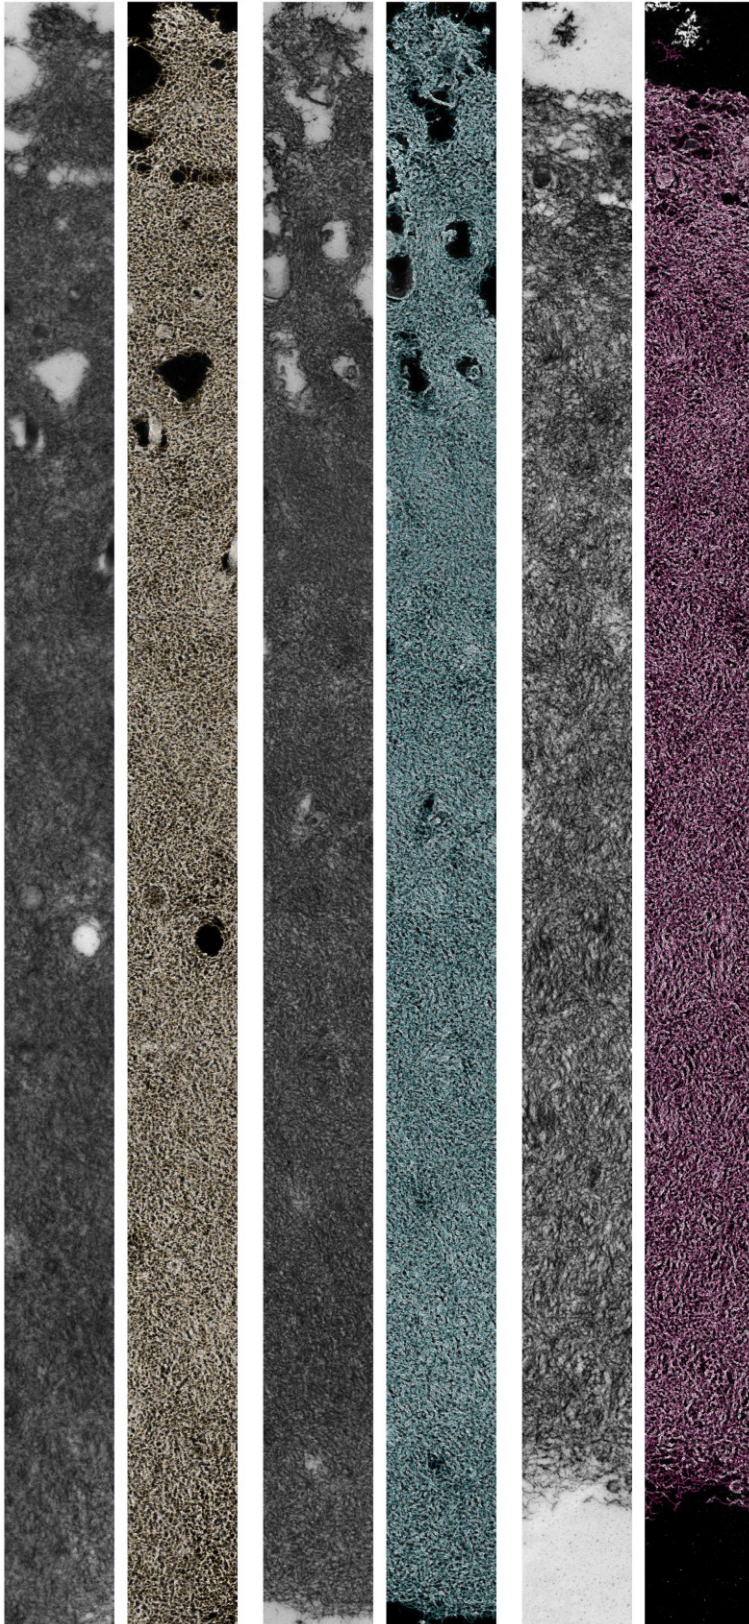

*ZPs Inner Surface*

1000 nm

**Figure S3.** TEM merged image of cross-sectioned matrix ZPs overlapped by cross-linked segmentation coloured images.



**Table S6.** Parameters of the deconvoluted Gaussian curves fitting the filament lengths.

| Gaussian Peaks Deconvolution of the ZP Stages |               |                                           |               |                                           |               |
|-----------------------------------------------|---------------|-------------------------------------------|---------------|-------------------------------------------|---------------|
| I-ZP<br>(Std Err – 5.80%, FWHM – 3.61 nm)     |               | M-ZP<br>(Std Err – 9.42%, FWHM – 4.22 nm) |               | F-ZP<br>(Std Err – 4.25%, FWHM – 3.58 nm) |               |
| Center (nm)                                   | Amplitude (%) | Center (nm)                               | Amplitude (%) | Center (nm)                               | Amplitude (%) |
| 9.99±0.47                                     | 0.40±0.33     | 9.90±0.37                                 | 0.27±0.15     | 9.89±0.14                                 | 0.46±0.10     |
| 14.23±0.10                                    | 0.64±0.06     | 14.19±0.11                                | 0.43±0.10     | 14.64±0.08                                | 0.72±0.05     |
| 17.19±0.08                                    | 0.83±0.10     | 17.11±0.10                                | 0.62±0.09     | 17.21±0.09                                | 0.71±0.05     |
| 23.02±0.16                                    | 0.57±0.05     | 23.89±0.23                                | 0.60±0.08     | 23.43±0.11                                | 0.70±0.05     |
| 27.11±0.13                                    | 0.67±0.06     | 27.82±0.17                                | 0.70±0.10     | 26.87±0.12                                | 0.66±0.06     |
| 30.92±0.16                                    | 0.61±0.06     | 31.02±0.18                                | 0.72±0.09     | 30.64±0.09                                | 0.68±0.07     |
| 35.93±0.10                                    | 0.82±0.06     | 36.77±0.18                                | 0.79±0.08     | 36.47±0.09                                | 0.77±0.06     |
| 40.12±0.13                                    | 0.71±0.07     | 41.60±0.13                                | 0.69±0.09     | 40.34±0.10                                | 0.86±0.06     |
| 44.22±0.12                                    | 0.76±0.07     | 45.63±0.18                                | 0.78±0.10     | 44.58±0.08                                | 0.85±0.08     |
| 48.66±0.14                                    | 0.79±0.07     | 49.93±0.25                                | 0.78±0.08     | 49.31±0.12                                | 0.83±0.08     |
| 53.46±0.15                                    | 0.75±0.07     | 55.92±0.19                                | 0.78±0.08     | 53.40±0.11                                | 0.94±0.09     |
| 57.71±0.17                                    | 0.70±0.08     | 60.13±0.20                                | 0.78±0.11     | 57.72±0.12                                | 0.95±0.09     |
| 62.10±0.18                                    | 0.82±0.07     | 63.44±0.20                                | 0.86±0.10     | 62.57±0.14                                | 0.90±0.11     |
| 66.79±0.18                                    | 0.79±0.09     | 68.74±0.20                                | 1.02±0.08     | 66.97±0.10                                | 1.09±0.09     |
| 70.78±0.15                                    | 0.86±0.10     | —                                         | —             | 71.41±0.10                                | 1.03±0.10     |
| 74.94±0.20                                    | 0.90±0.09     | 74.83±0.21                                | 0.96±0.13     | —                                         | —             |
| —                                             | —             | 76.85±0.19                                | 0.96±0.10     | 75.70±0.08                                | 1.12±0.10     |
| 80.22±0.18                                    | 1.02±0.08     | 82.70±0.16                                | 1.01±0.11     | 81.11±0.09                                | 1.16±0.10     |
| 84.42±0.11                                    | 0.87±0.11     | —                                         | —             | 85.45±0.09                                | 1.02±0.12     |
| 88.02±0.19                                    | 0.95±0.08     | 87.83±0.20                                | 1.11±0.09     | 88.79±0.09                                | 1.11±0.10     |
| 93.70±0.17                                    | 0.96±0.09     | —                                         | —             | 94.00±0.11                                | 1.04±0.08     |
| 98.87±0.22                                    | 0.85±0.08     | 98.06±0.21                                | 1.09±0.08     | 98.90±0.16                                | 0.80±0.09     |
| —                                             | —             | 104.00±0.17                               | 0.99±0.09     | 101.91±0.17                               | 0.76±0.10     |
| 106.47±0.18                                   | 0.89±0.06     | —                                         | —             | 107.69±0.19                               | 0.73±0.08     |
| 110.89±0.14                                   | 0.66±0.10     | 111.81±0.22                               | 0.97±0.08     | 112.96±0.24                               | 0.63±0.07     |
| 114.61±0.19                                   | 0.75±0.08     | —                                         | —             | —                                         | —             |
| 120.04±0.21                                   | 0.76±0.07     | 118.61±0.26                               | 0.87±0.08     | 115.71±0.20                               | 0.65±0.06     |
| 124.63±0.17                                   | 0.72±0.08     | 124.06±0.29                               | 0.73±0.13     | 123.53±0.15                               | 0.53±0.07     |
| 128.95±0.21                                   | 0.68±0.07     | 127.45±0.29                               | 0.79±0.09     | 127.83±0.19                               | 0.55±0.05     |
| 133.61±0.27                                   | 0.57±0.08     | 133.62±0.19                               | 0.86±0.07     | 133.97±0.21                               | 0.48±0.04     |
| 137.75±0.25                                   | 0.53±0.06     | —                                         | —             | 140.88±0.17                               | 0.37±0.04     |
| 143.70±0.26                                   | 0.45±0.06     | —                                         | —             | —                                         | —             |
| 149.20±0.24                                   | 0.46±0.05     | —                                         | —             | 147.74±0.16                               | 0.34±0.04     |
| —                                             | —             | —                                         | —             | 153.44±0.20                               | 0.27±0.04     |
| 156.61±0.29                                   | 0.38±0.04     | 157.50±0.22                               | 0.58±0.04     | 157.33±0.16                               | 0.33±0.04     |
| 164.29±0.34                                   | 0.36±0.04     | —                                         | —             | 162.13±0.24                               | 0.24±0.04     |
| —                                             | —             | —                                         | —             | 168.48±0.20                               | 0.23±0.03     |
| —                                             | —             | 172.17±0.25                               | 0.37±0.05     | —                                         | —             |
| —                                             | —             | —                                         | —             | 176.49±0.26                               | 0.19±0.02     |
| —                                             | —             | 187.79±0.31                               | 0.31±0.05     | —                                         | —             |
| —                                             | —             | 201.95±0.36                               | 0.20±0.05     | —                                         | —             |

Note: p < 0.01 statistical significant difference between experimental and theoretical data fitting

**Table S7.** Parameters of the Deconvoluted Gaussian curves fitting the network filament segments. And theoretical prediction of the filament lengths related to glob-rod angles.

| Gly-filament Arrangements of Immature ZP Filaments |                                                  |           |             |           |             |           | Gly-filament Arrangements of Mature ZP Filaments |                                                  |           |             |           |             |           | Gly-filament Arrangements of Fertilized ZP Filaments |                                                  |           |             |           |             |           |
|----------------------------------------------------|--------------------------------------------------|-----------|-------------|-----------|-------------|-----------|--------------------------------------------------|--------------------------------------------------|-----------|-------------|-----------|-------------|-----------|------------------------------------------------------|--------------------------------------------------|-----------|-------------|-----------|-------------|-----------|
| Exper.                                             | Theoretical Filament Lengths and Glob-Rod Angles |           |             |           |             |           | Exper.                                           | Theoretical Filament Lengths and Glob-Rod Angles |           |             |           |             |           | Exper.                                               | Theoretical Filament Lengths and Glob-Rod Angles |           |             |           |             |           |
| Center (nm)                                        | Length (nm)                                      | Angle (°) | Length (nm) | Angle (°) | Length (nm) | Angle (°) | Center (nm)                                      | Length (nm)                                      | Angle (°) | Length (nm) | Angle (°) | Length (nm) | Angle (°) | Center (nm)                                          | Length (nm)                                      | Angle (°) | Length (nm) | Angle (°) | Length (nm) | Angle (°) |
| 9.99                                               | 9.99                                             | —         | 9.99        | —         | 9.99        | —         | 9.90                                             | 9.90                                             | —         | 9.90        | —         | 9.90        | —         | 9.89                                                 | 9.89                                             | —         | 9.89        | —         | 9.89        | —         |
| 14.23                                              | —                                                | —         | —           | —         | 14.23       | —         | 14.19                                            | —                                                | —         | —           | —         | —           | 14.19     | —                                                    | —                                                | —         | —           | —         | 14.64       | —         |
| 17.19                                              | 17.19                                            | —         | 17.19       | —         | —           | —         | 17.11                                            | 17.11                                            | —         | 17.11       | —         | —           | —         | 17.21                                                | 17.21                                            | —         | 17.21       | —         | —           | —         |
| 23.02                                              | —                                                | —         | —           | —         | 24.15       | 116.87    | 23.89                                            | —                                                | —         | —           | —         | 24.89       | 122.57    | 23.43                                                | —                                                | —         | —           | —         | 24.56       | 112.56    |
| 27.11                                              | 27.11                                            | 104.09    | —           | —         | —           | —         | 27.82                                            | 27.82                                            | 108.77    | —           | —         | —           | —         | 26.87                                                | 26.99                                            | 103.28    | —           | —         | —           | —         |
| 30.92                                              | —                                                | —         | 29.64       | 119.11    | —           | —         | 31.02                                            | —                                                | —         | 30.22       | 124.03    | —           | —         | 30.64                                                | —                                                | —         | 29.44       | 117.80    | —           | —         |
| 35.93                                              | —                                                | —         | —           | —         | 36.63       | 122.56    | 36.77                                            | —                                                | —         | —           | —         | 37.49       | 125.23    | 36.47                                                | —                                                | —         | —           | —         | 37.31       | 119.44    |
| 40.12                                              | 40.65                                            | 103.93    | —           | —         | —           | —         | 41.60                                            | 41.60                                            | 107.29    | —           | —         | —           | —         | 40.34                                                | 40.51                                            | 103.55    | —           | —         | —           | —         |
| 44.22                                              | —                                                | —         | 44.06       | 114.03    | —           | —         | 45.63                                            | —                                                | —         | 45.22       | 122.62    | —           | —         | 44.58                                                | —                                                | —         | 43.93       | 114.90    | —           | —         |
| 48.56                                              | —                                                | —         | —           | —         | 49.14       | 123.07    | 49.93                                            | —                                                | —         | —           | —         | 50.11       | 125.58    | 49.31                                                | —                                                | —         | —           | —         | 50.05       | 119.29    |
| 53.46                                              | 54.22                                            | 104.26    | —           | —         | —           | —         | 55.92                                            | 55.52                                            | 108.89    | —           | —         | —           | —         | 53.40                                                | 54.11                                            | 104.41    | —           | —         | —           | —         |
| 57.71                                              | —                                                | —         | 57.71       | 105.13    | —           | —         | 60.13                                            | —                                                | —         | 59.93       | 118.44    | —           | —         | 57.72                                                | —                                                | —         | 57.98       | 108.48    | —           | —         |
| 62.10                                              | —                                                | —         | —           | —         | 61.61       | 122.40    | 63.44                                            | —                                                | —         | —           | —         | 62.72       | 125.40    | 62.57                                                | —                                                | —         | —           | —         | 62.86       | 120.37    |
| 66.79                                              | 67.73                                            | 103.71    | —           | —         | —           | —         | 68.74                                            | 69.39                                            | 108.31    | —           | —         | —           | —         | 66.97                                                | 67.65                                            | 103.76    | —           | —         | —           | —         |
| 70.78                                              | —                                                | —         | 71.35       | 105.13    | —           | —         | 74.83                                            | —                                                | —         | 74.20       | 113.14    | —           | —         | 71.41                                                | —                                                | —         | 71.74       | 106.34    | —           | —         |
| 74.94                                              | —                                                | —         | —           | —         | 74.03       | 121.57    | 76.85                                            | —                                                | —         | —           | —         | 75.33       | 125.40    | 75.70                                                | —                                                | —         | —           | —         | 75.80       | 122.48    |
| 80.22                                              | 81.27                                            | 103.82    | —           | —         | —           | —         | 82.70                                            | 83.31                                            | 108.89    | —           | —         | —           | —         | 81.11                                                | 81.20                                            | 103.98    | —           | —         | —           | —         |
| 84.42                                              | —                                                | —         | 85.06       | 105.79    | —           | —         | 87.83                                            | —                                                | —         | 88.94       | 118.83    | 87.34       | 115.63    | 85.45                                                | —                                                | —         | 85.45       | 105.79    | —           | —         |
| 88.02                                              | —                                                | —         | —           | —         | 86.67       | 125.31    | 98.06                                            | 97.64                                            | 113.75    | —           | —         | 99.34       | 115.48    | 88.79                                                | —                                                | —         | —           | —         | 88.79       | 123.27    |
| 93.70                                              | 94.77                                            | 103.50    | —           | —         | —           | —         | 104.00                                           | —                                                | —         | 103.67      | 118.83    | —           | —         | 94.00                                                | 94.73                                            | 103.55    | —           | —         | —           | —         |
| 98.87                                              | —                                                | —         | 99.31       | 111.99    | 99.26       | 124.44    | 111.81                                           | 112.21                                           | 116.76    | —           | —         | 111.71      | 121.32    | 98.90                                                | —                                                | —         | 99.13       | 105.46    | —           | —         |
| 106.47                                             | 108.29                                           | 103.71    | —           | —         | —           | —         | 118.61                                           | —                                                | —         | 118.50      | 120.16    | —           | —         | 101.91                                               | —                                                | —         | —           | —         | 101.81      | 123.66    |
| 110.89                                             | —                                                | —         | —           | —         | 111.77      | 123.07    | 124.06                                           | —                                                | —         | —           | —         | 124.06      | 120.99    | 107.69                                               | 108.21                                           | 103.12    | —           | —         | —           | —         |
| 114.61                                             | —                                                | —         | 114.01      | 117.55    | —           | —         | 127.45                                           | 127.03                                           | 120.03    | —           | —         | —           | —         | 112.96                                               | —                                                | —         | 112.96      | 107.13    | —           | —         |
| 120.04                                             | 121.81                                           | 103.71    | —           | —         | —           | —         | 133.62                                           | 142.00                                           | 122.07    | 133.44      | 121.65    | —           | —         | 115.71                                               | —                                                | —         | —           | —         | 114.82      | 123.57    |
| 124.63                                             | —                                                | —         | —           | —         | 124.38      | 124.78    | 157.50                                           | 157.01                                           | 122.62    | —           | —         | —           | —         | 123.53                                               | 121.75                                           | 103.76    | —           | —         | —           | —         |
| 128.95                                             | —                                                | —         | 128.55      | 115.52    | —           | —         | 172.17                                           | 171.97                                           | 121.93    | —           | —         | —           | —         | 127.83                                               | —                                                | —         | 127.06      | 110.21    | —           | —         |
| 133.61                                             | 135.39                                           | 104.36    | —           | —         | —           | —         | 187.79                                           | 186.89                                           | 121.38    | —           | —         | —           | —         | 133.97                                               | 135.29                                           | 103.76    | —           | —         | —           | —         |
| 137.75                                             | —                                                | —         | —           | —         | 136.91      | 123.41    | 201.95                                           | 201.85                                           | 121.93    | —           | —         | —           | —         | 140.88                                               | —                                                | —         | 140.78      | 105.90    | —           | —         |
| 143.70                                             | —                                                | —         | 143.23      | 117.29    | —           | —         | —                                                | —                                                | —         | —           | —         | —           | —         | 147.74                                               | 148.85                                           | 103.98    | —           | —         | —           | —         |
| 149.20                                             | 149.20                                           | 103.71    | —           | —         | —           | —         | —                                                | —                                                | —         | —           | —         | —           | —         | 153.44                                               | —                                                | —         | 154.58      | 106.79    | —           | —         |
| 156.61                                             | —                                                | —         | 157.04      | 106.90    | —           | —         | —                                                | —                                                | —         | —           | —         | —           | —         | 157.33                                               | —                                                | —         | —           | —         | —           | —         |
| 164.29                                             | 163.09                                           | 107.81    | —           | —         | —           | —         | —                                                | —                                                | —         | —           | —         | —           | —         | 162.13                                               | 162.43                                           | 104.19    | —           | —         | —           | —         |
| —                                                  | —                                                | —         | —           | —         | —           | —         | —                                                | —                                                | —         | —           | —         | —           | —         | 168.48                                               | —                                                | —         | 168.48      | 107.92    | —           | —         |
| —                                                  | —                                                | —         | —           | —         | —           | —         | —                                                | —                                                | —         | —           | —         | —           | —         | 176.49                                               | 176.29                                           | 107.28    | —           | —         | —           | —         |

**Table S8.** Summary results of the structural parameters of gly-filaments.

| ZP Stage   | Total Filament Segments                    |                                             | Total Interconnections Rate (%)              | Unbranched Filaments Rate (%) |                | Triple Interconnections Rate (%) |                |                         |                |
|------------|--------------------------------------------|---------------------------------------------|----------------------------------------------|-------------------------------|----------------|----------------------------------|----------------|-------------------------|----------------|
| Immature   | 11056                                      |                                             | 64.77                                        | 4.63                          |                | 63.70                            |                |                         |                |
| Mature     | 11408                                      |                                             | 64.38                                        | 7.82                          |                | 63.32                            |                |                         |                |
| Fertilized | 9654                                       |                                             | 61.02                                        | 16.22                         |                | 60.27                            |                |                         |                |
| ZP Stage   | R <sub>Hamilton</sub> (%) Lengths (type I) | R <sub>Hamilton</sub> (%) Lengths (type II) | R <sub>Hamilton</sub> (%) Lengths (type III) | Type I                        |                | Type II                          |                | Type III                |                |
|            |                                            |                                             |                                              | Average Glob-Rod Angles       | Total Sub-Unit | Average Glob-Rod Angles          | Total Sub-Unit | Average Glob-Rod Angles | Total Sub-Unit |
| Immature   | 1.12                                       | 1.88                                        | 1.13                                         | 104.53±1.43°                  | 12             | 111.83±5.64°                     | 11             | 122.75±2.36°            | 11             |
| Mature     | 0.58                                       | 0.65                                        | 0.56                                         | 115.10±6.39°                  | 13             | 119.72±4.33°                     | 9              | 121.96±4.85°            | 10             |
| Fertilized | 0.94                                       | 1.03                                        | 1.40                                         | 103.99±1.05°                  | 14             | 108.90±3.94°                     | 11             | 120.59±3.72°            | 9              |

Note:  $p < 0.001$  statistical significant difference between experimental and theoretical data fitting.
